# Supplementary material for: In situ probing of doping- and stress-mediated phase transitions in a single-crystalline VO2 nanobeam by spatially resolved Raman spectroscopy
Source: Royal Society of Chemistry journal article supplement (doi:10.1039/c4nr01118j), 2014-01-01
Supplement: c4nr01118j1.pdf [file c4nr01118j1.pdf]

Supporting Information

## *In Situ* Probing of Doping- and Stress-Mediated Phase Transitions in a 5 Single-Crystalline VO<sub>2</sub> Nanobeam by Spatially Resolved Raman Spectroscopy

Sung-Jin Chang,<sup>a,b</sup> Jong Bae Park,<sup>c,d</sup> Gaehang Lee,<sup>a</sup> Hae Jin Kim,<sup>a</sup> Jin-Bae Lee,<sup>a</sup> Tae-Sung Bae,<sup>c</sup> Young-Kyu Han,<sup>e</sup> Tae Jung Park,<sup>b</sup> Yun Suk Huh,<sup>\*f</sup> and Woong-Ki Hong<sup>\*c</sup>

### 10 1. A schematic illustration of a PDMS transfer method

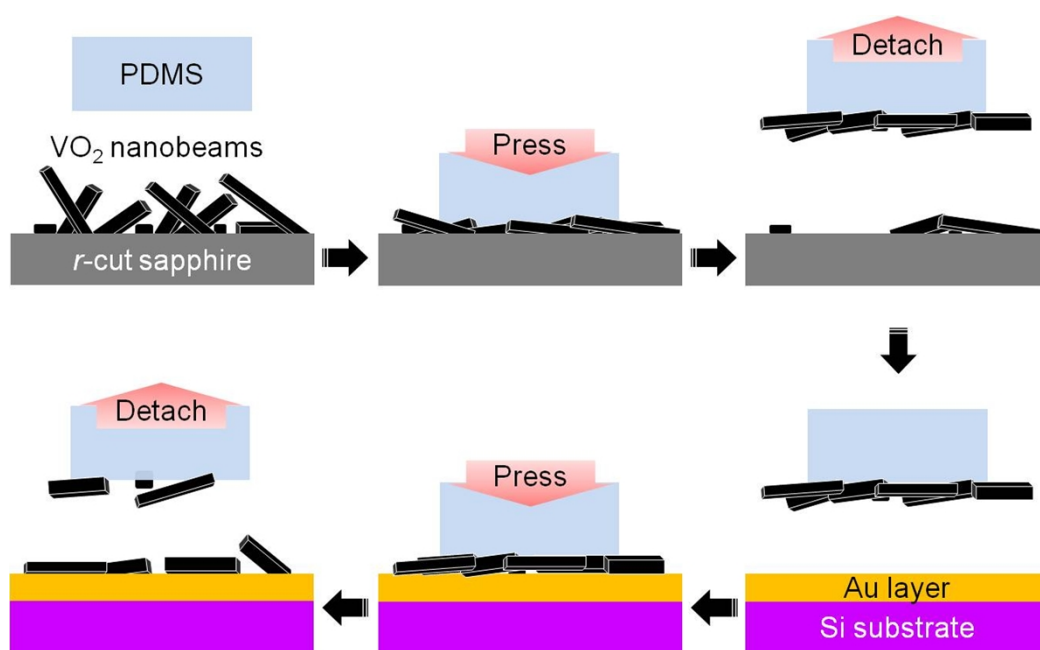

15 Fig. S1. A schematic illustration of PDMS transfer method: the procedures for the mechanical transfer of VO<sub>2</sub> nanobeams into a Au-coated substrate from VO<sub>2</sub> nanobeams grown on *r*-cut sapphire substrates using a PDMS slab.

## 2. An experimental set-up equipment for *in situ* Raman measurements combined with confocal laser scanning microscopy

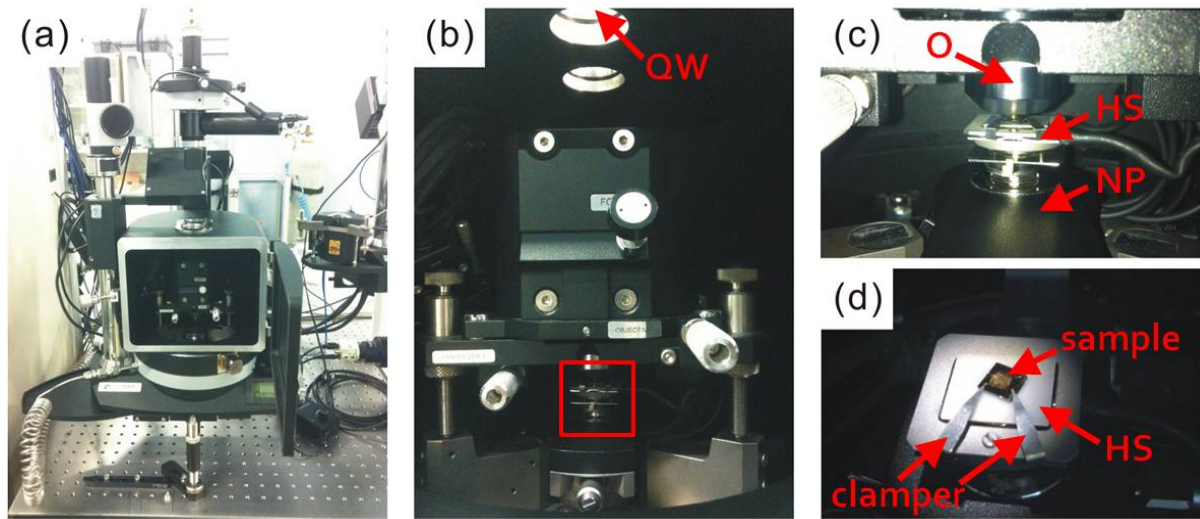

5

**Fig. S2.** An experimental set-up equipment for *in situ* Raman measurements: (a) an airtight chamber, (b) header with an objective lens (O) inside the chamber with the quartz window (QW) in (a), (c) the magnified view of red box in (b), the objective lens (O), the heating stage (HS), and the nanopositioner (NP), and (d) the sample clamped on the heating stage (HS).

10

15

20

### 3. A schematic illustration of a chronological sequence of experiments

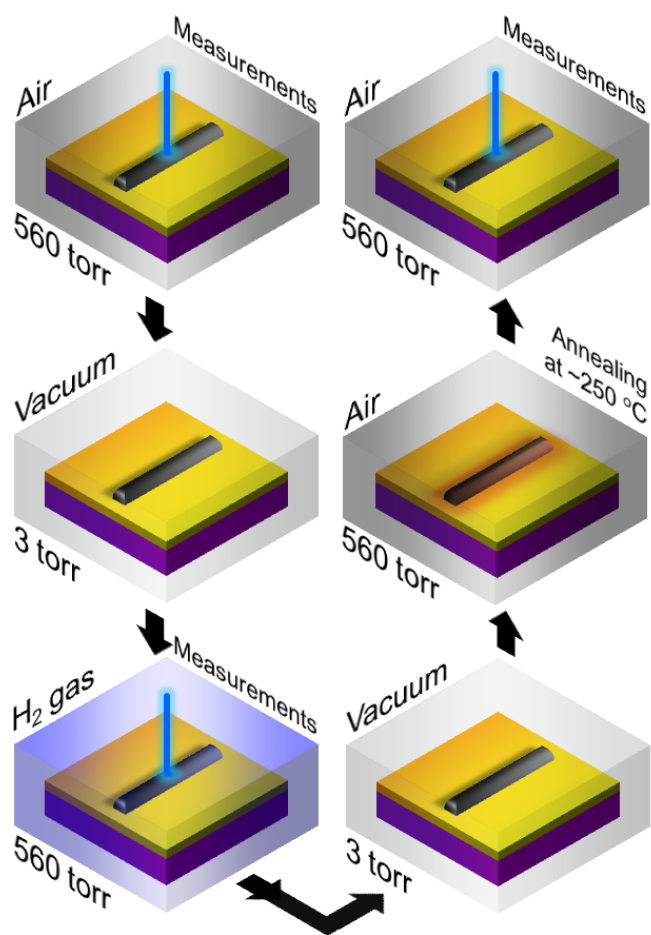

5

Fig. S3. A schematic illustration of a chronological sequence of *in situ* Raman measurements.

10

15

#### 4. Raman spectra of the M1, T, M2, and R phases

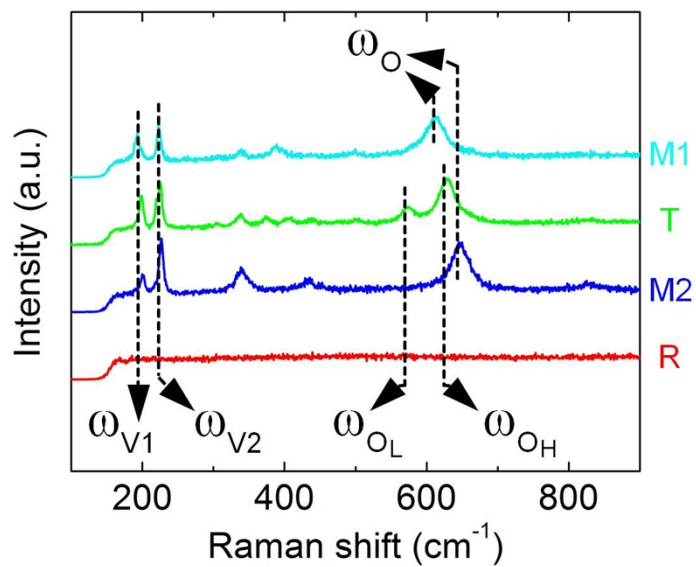

5 Fig. S4. Raman spectra of the M1 (cyan), T (green), M2 (blue), and R (red) phases for individual single-crystalline VO<sub>2</sub> nanobeams.

10

15

20

5. Energy dispersive X-ray spectroscopy (EDS) data of a VO<sub>2</sub> nanobeam synthesized on an *r*-cut sapphire substrate

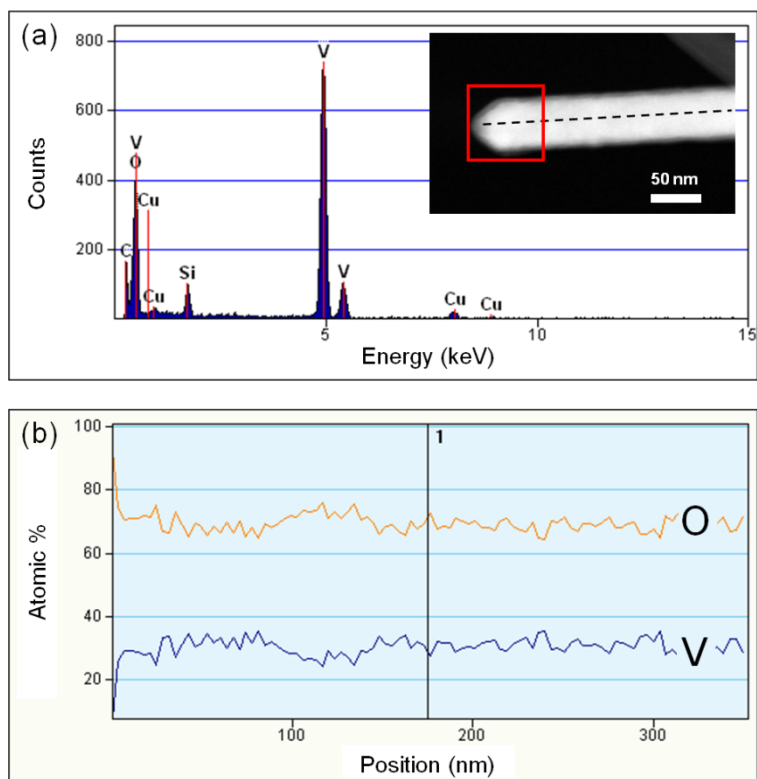

5 **Fig. S5.** (a) The EDS spectrum obtained from the region marked by square on the inset image of a VO<sub>2</sub> nanobeam that grown on an *r*-cut sapphire substrate. The inset of (a) shows high-angle annular dark-field (HAADF) scanning transmission electron microscope (STEM) image of the VO<sub>2</sub> nanobeam. (b) The STEM EDS elemental line profile obtained the VO<sub>2</sub> nanobeam along the dotted line in the inset of (a).

10

15

## 6. Raman spectra of a free-standing VO<sub>2</sub> nanobeam (as-grown sample) under air upon heating

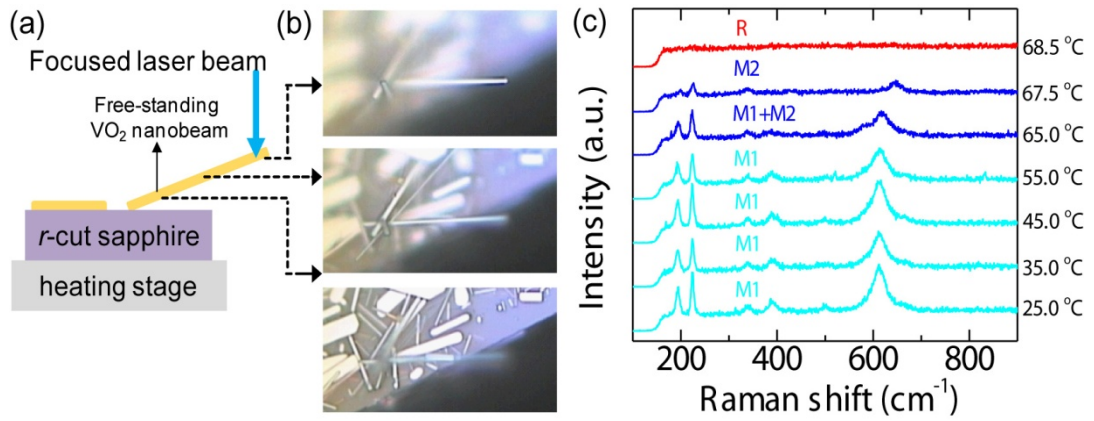

**Fig. S6.** (a) Schematic illustration, (b) optical microscopy images, and (c) temperature dependence of Raman spectra during a heating cycle for a free-standing VO<sub>2</sub> nanobeam grown on an r-cut sapphire substrate.

5

10

15

20

## 7. Mapping images of the Raman spectra intensity of a VO<sub>2</sub> nanobeam under air

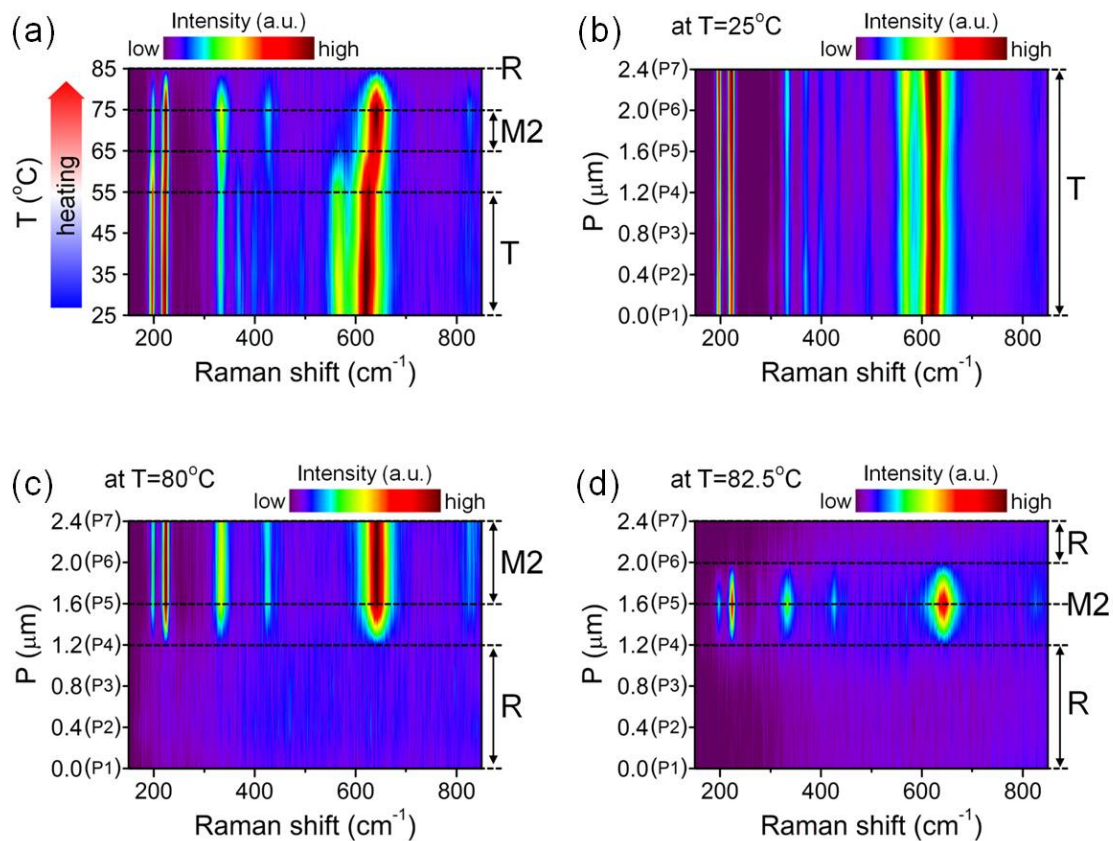

5 **Fig. S7.** Mapping images of the Raman spectra intensity of an individual VO<sub>2</sub> nanobeam under air (at the pressure of ~560 torr). (a) A mapping image of the Raman intensity at the position of P2 on the nanobeam (Figure 3a) as a function of temperature upon heating. (b-d) Mapping images of the Raman intensity as a function of position along the length of the nanobeam (from P1 to P7 in Figure 3a) at (b) 25 °C, (c) 80 °C, and (d) 82.5 °C upon heating, respectively.

10

15

20

## 8. Mapping images of the Raman spectra intensity of a VO<sub>2</sub> nanobeam under hydrogen gas

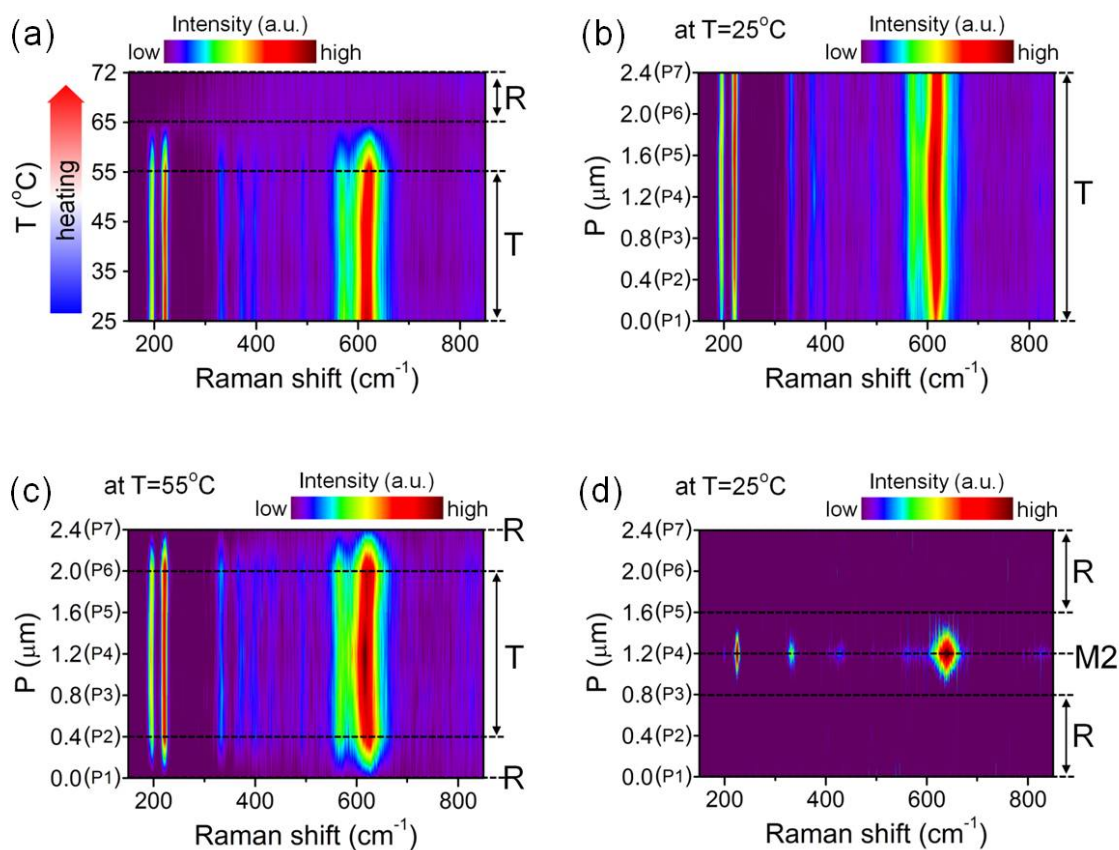

5 **Fig. S8.** Mapping images of the Raman spectra intensity of an individual VO<sub>2</sub> nanobeam under hydrogen gas (at the pressure of ~560 torr). (a) A mapping image of the Raman intensity at the position of P2 on the nanobeam (Figure 4a) as a function of temperature upon heating. (b-d) Mapping images of the Raman intensity as a function of position along the length of the nanobeam (from P1 to P7 in Figure 4a) at (b) 25 °C and (c) 55 °C upon heating, and (d) 25 °C upon cooling, respectively.

10

15

20

25



9. Mapping images of the Raman spectra intensity of a VO<sub>2</sub> nanobeam after 250 °C annealing process in air

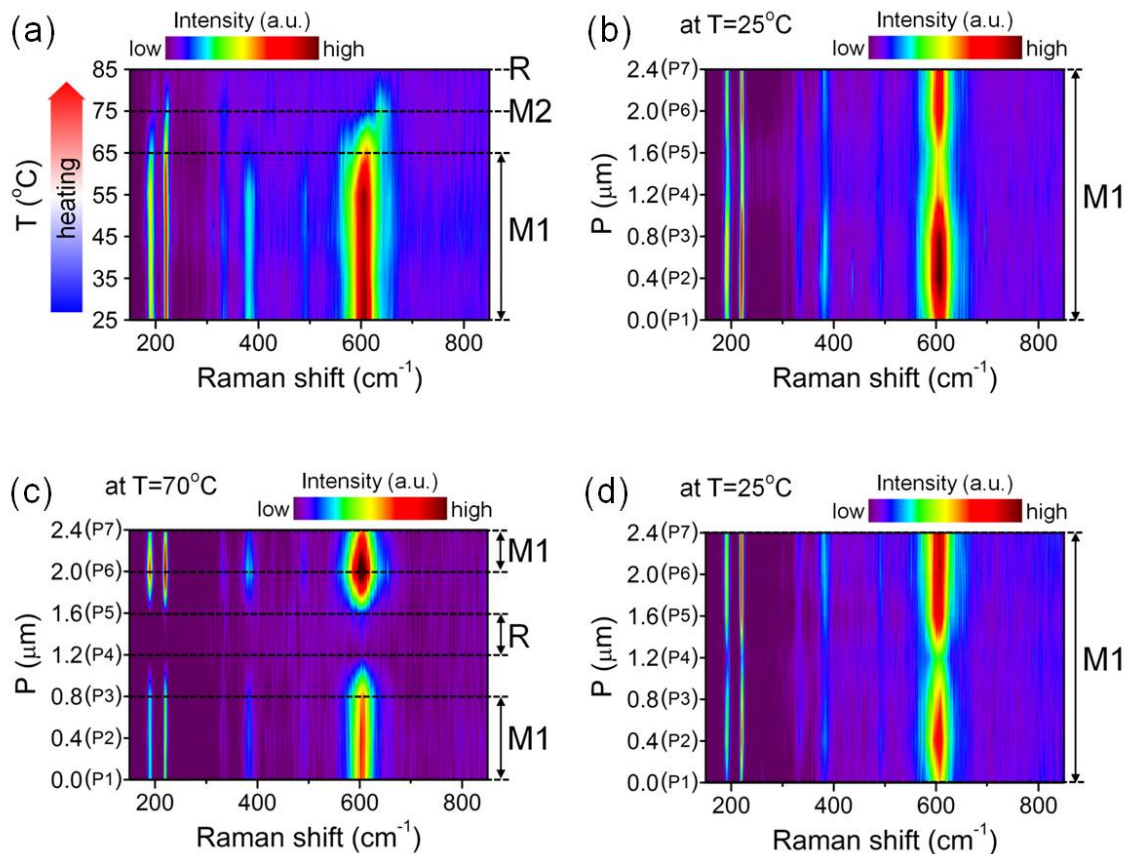

5

**Fig. S9.** Mapping images of the Raman spectra intensity of an individual VO<sub>2</sub> nanobeam under air (at the pressure of ~560 torr) after annealing at 250 °C in air. (a) A mapping image of the Raman intensity at the position of P2 on the nanobeam (Figure 5a) as a function of temperature upon heating. (b-d) Mapping images of the Raman intensity as a function of position along the length of the nanobeam (from P1 to P7 in Figure 5a) at (b) 25 °C and (c) 70 °C upon heating, and (d) 25 °C upon cooling, respectively.

10

15

20

25

## 10. *In Situ* Raman measurement conditions and corresponding phase evolutions in a VO<sub>2</sub> nanobeam

**Table S1** Summary of *in situ* Raman probing of phase evolution in a VO<sub>2</sub> nanobeam.

| Measurement conditions    | Phase evolution at position P2 (Figs. 3-5) |                 | Remarks                                                     |
|---------------------------|--------------------------------------------|-----------------|-------------------------------------------------------------|
|                           | Heating                                    | Cooling         |                                                             |
| ~560 torr in air          | T → M2 at 65 °C<br>M2 → R at 85 °C         | R → T at 35 °C  | Transferred VO <sub>2</sub>                                 |
| ~560 torr in hydrogen gas | T → R at 65 °C                             | R → R           | Hydrogen-doped VO <sub>2</sub>                              |
| ~560 torr in air          | M1 → M2 at 75 °C<br>M2 → R at 85 °C        | R → M1 at 55 °C | After annealing at ~250°C of hydrogen-doped VO <sub>2</sub> |
